# Supplementary material for: Mitochondria-targeting EGCG derivatives protect H9c2 cardiomyocytes from H2O2-induced apoptosis: design, synthesis and biological evaluation
Source: Royal Society of Chemistry journal article supplement (doi:10.1039/d3ra04527g), 2023-01-01
Supplement: d3ra04527g1.pdf [file d3ra04527g1.pdf]

## **Mitochondria-targeting EGCG derivatives protect H9c2 cardiomyocytes from H<sub>2</sub>O<sub>2</sub>-induced apoptosis: Design, synthesis and biological evaluation**

Revathy Sahadevan<sup>a†</sup>, Anupama Binoy<sup>a†</sup>, Irene Shajan<sup>a</sup>, and Sushabhan Sadhukhan<sup>ab\*</sup>

<sup>a</sup>Department of Chemistry, <sup>b</sup>Physical & Chemical Biology Laboratory and Department of Biological Sciences & Engineering, Indian Institute of Technology Palakkad, Kerala, India

<sup>#</sup>Equal contribution

\*Corresponding author. *E-mail address:* [sushabhan@iitpkd.ac.in](mailto:sushabhan@iitpkd.ac.in)

## Table of Contents

|                                                                                |    |
|--------------------------------------------------------------------------------|----|
| 1. HPLC analysis of MitoEGCG <sub>n</sub> compounds .....                      | 3  |
| <b>Figure S1.</b> HPLC chromatogram of MitoEGCG <sub>4</sub> .....             | 3  |
| <b>Figure S2.</b> HPLC chromatogram of MitoEGCG <sub>6</sub> .....             | 3  |
| <b>Figure S3.</b> HPLC chromatogram of MitoEGCG <sub>8</sub> .....             | 4  |
| 2. Mass spectra of MitoEGCG <sub>n</sub> compounds .....                       | 5  |
| <b>Figure S4.</b> Mass spectrum of Mito EGCG <sub>4</sub> .....                | 5  |
| <b>Figure S5.</b> Mass spectrum of Mito EGCG <sub>6</sub> .....                | 5  |
| <b>Figure S6.</b> Mass spectrum of Mito EGCG <sub>8</sub> .....                | 6  |
| 3. <sup>1</sup> H NMR spectra of MitoEGCG <sub>n</sub> compounds.....          | 7  |
| <b>Figure S7.</b> <sup>1</sup> H NMR spectrum of MitoEGCG <sub>4</sub> .....   | 7  |
| <b>Figure S8.</b> <sup>1</sup> H NMR spectrum of MitoEGCG <sub>6</sub> .....   | 8  |
| <b>Figure S9.</b> <sup>1</sup> H NMR spectrum of MitoEGCG <sub>8</sub> .....   | 9  |
| 4. <sup>13</sup> C NMR spectra of MitoEGCG <sub>n</sub> compounds .....        | 10 |
| <b>Figure S10.</b> <sup>13</sup> C NMR spectrum of MitoEGCG <sub>4</sub> ..... | 10 |
| <b>Figure S11.</b> <sup>13</sup> C NMR spectrum of MitoEGCG <sub>6</sub> ..... | 11 |
| <b>Figure S12.</b> <sup>13</sup> C NMR spectrum of MitoEGCG <sub>8</sub> ..... | 12 |
| 5. Bright field images of DCFH-DA stained H9c2 cells.....                      | 13 |
| 6. Bright field images of TMRE-stained H9c2 cells .....                        | 13 |
| 7. Uncropped Western blot images .....                                         | 14 |

## 1. HPLC analysis of MitoEGCG<sub>n</sub> compounds

Solvents used for the HPLC analysis were LC-MS grade water with 0.1% acetic acid (solvent A) and LC-MS grade acetonitrile with 0.1% acetic acid (solvent B). The MitoEGCG<sub>n</sub> compounds were eluted at a flow rate of 0.7 mL/min. The solvent gradient used for the HPLC analysis was of 5% solvent B for 1 min, followed by a linear gradient from 5% to 60% solvent B over 4 min, continued for 1 min, followed by changing the solvent B from 60% to 95% in 3 min, continued for another 3 min, and finally, it was brought down to 5% solvent B in 1.5 min and then continued for another 1.5 min before the method stopped. Column was always washed with 50% Solvent B followed by 95% Solvent B before sample injection.

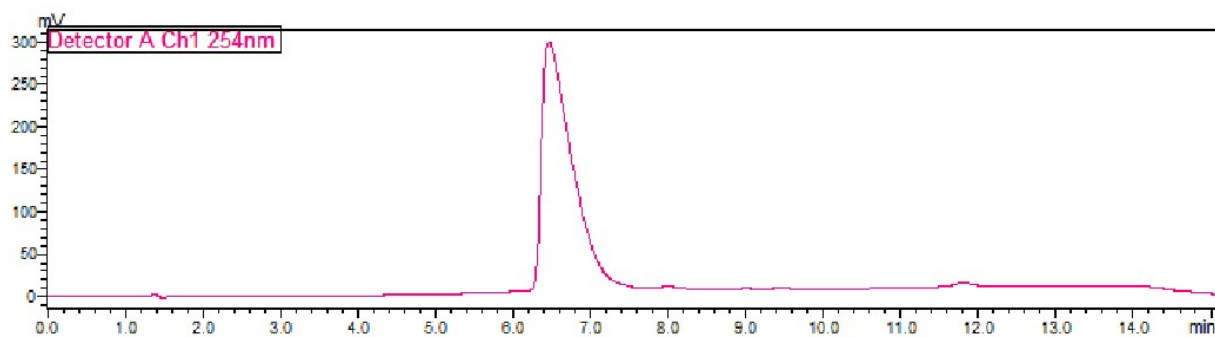

**Figure S1.** HPLC chromatogram of MitoEGCG<sub>4</sub> showing > 99.2% purity.

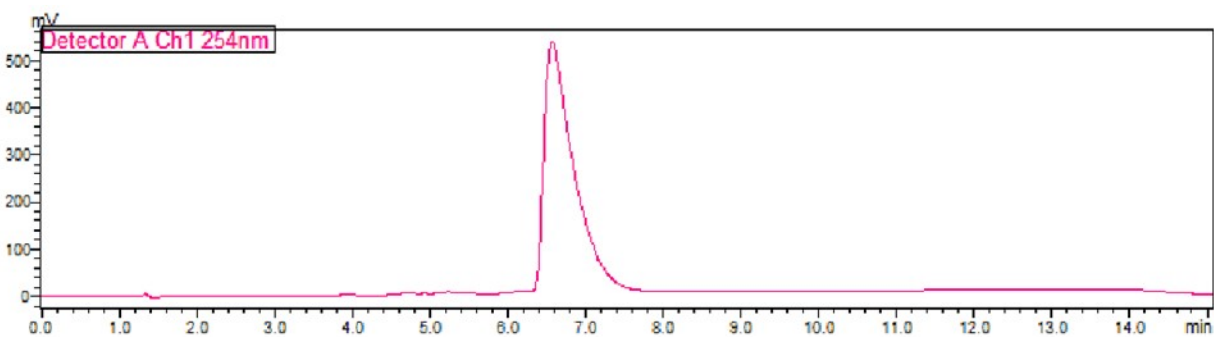

**Figure S2.** HPLC chromatogram of MitoEGCG<sub>6</sub> showing >99.4% purity.

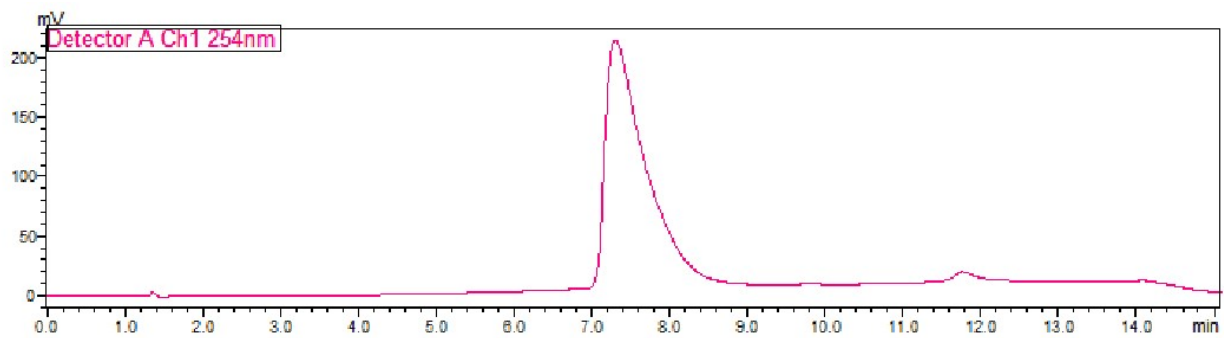

**Figure S3.** HPLC chromatogram of MitoEGCG<sub>8</sub> showing > 98.6% purity.

## 2. Mass spectra of MitoEGCG<sub>n</sub> compounds

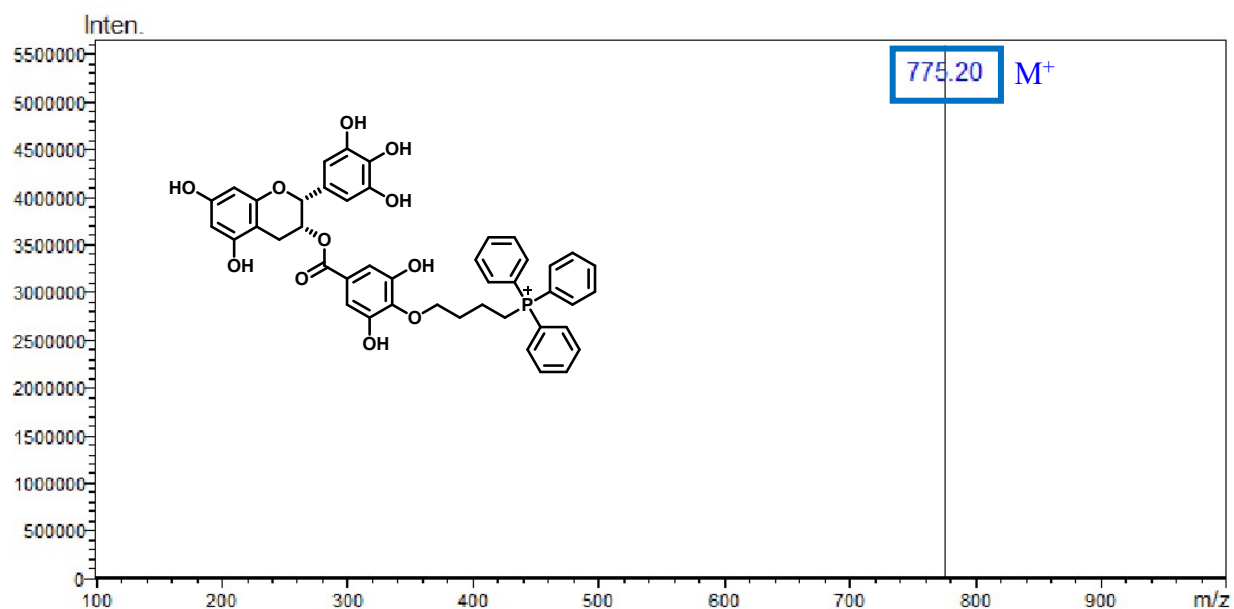

**Figure S4.** Mass spectrum of MitoEGCG<sub>4</sub> (Exact mass 775.23 Da).

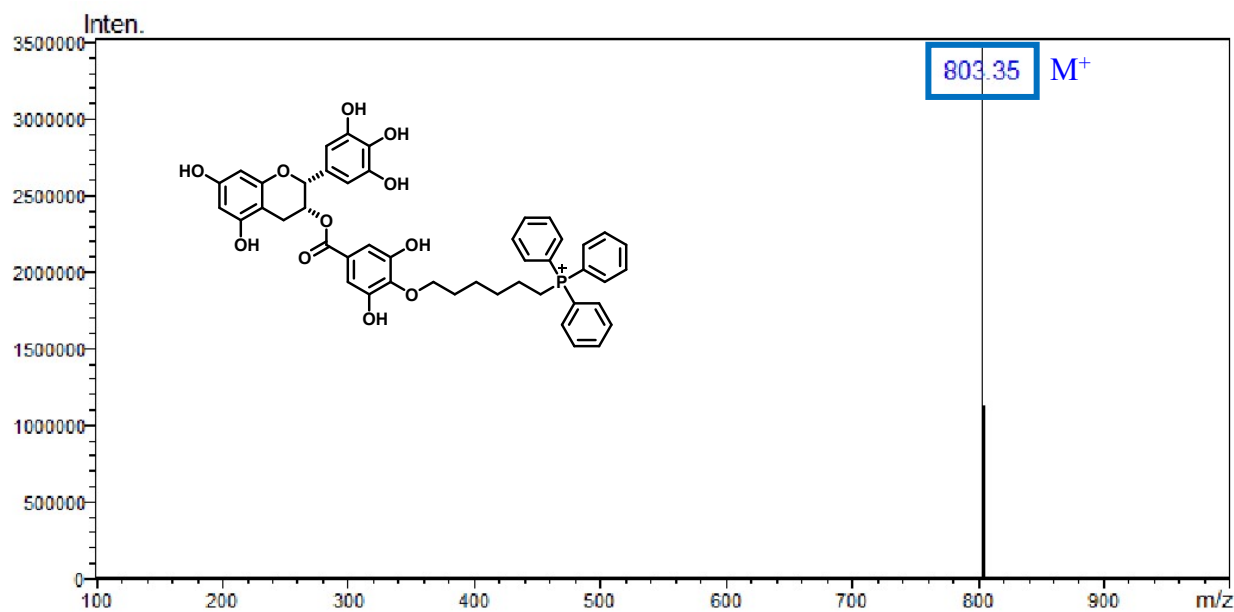

**Figure S5.** Mass spectrum of MitoEGCG<sub>6</sub> (Exact mass 803.26 Da).

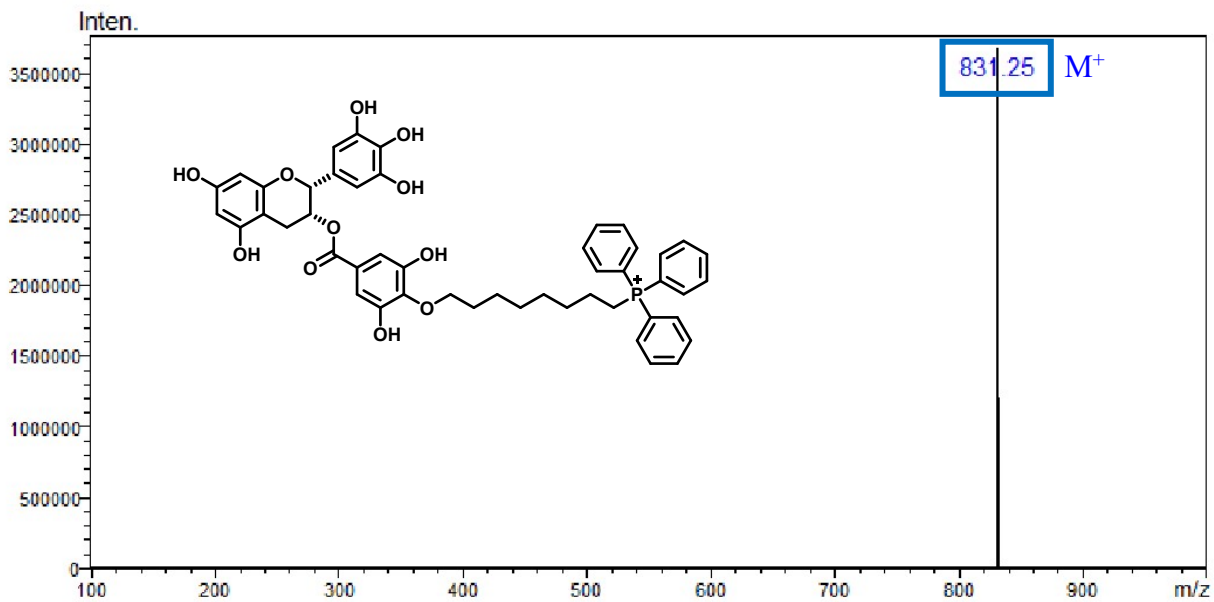

**Figure S6.** Mass spectrum of MitoEGCG<sub>8</sub> (Exact mass 831.29 Da).

### 3. $^1\text{H}$ NMR spectra of MitoEGCG<sub>n</sub> compounds

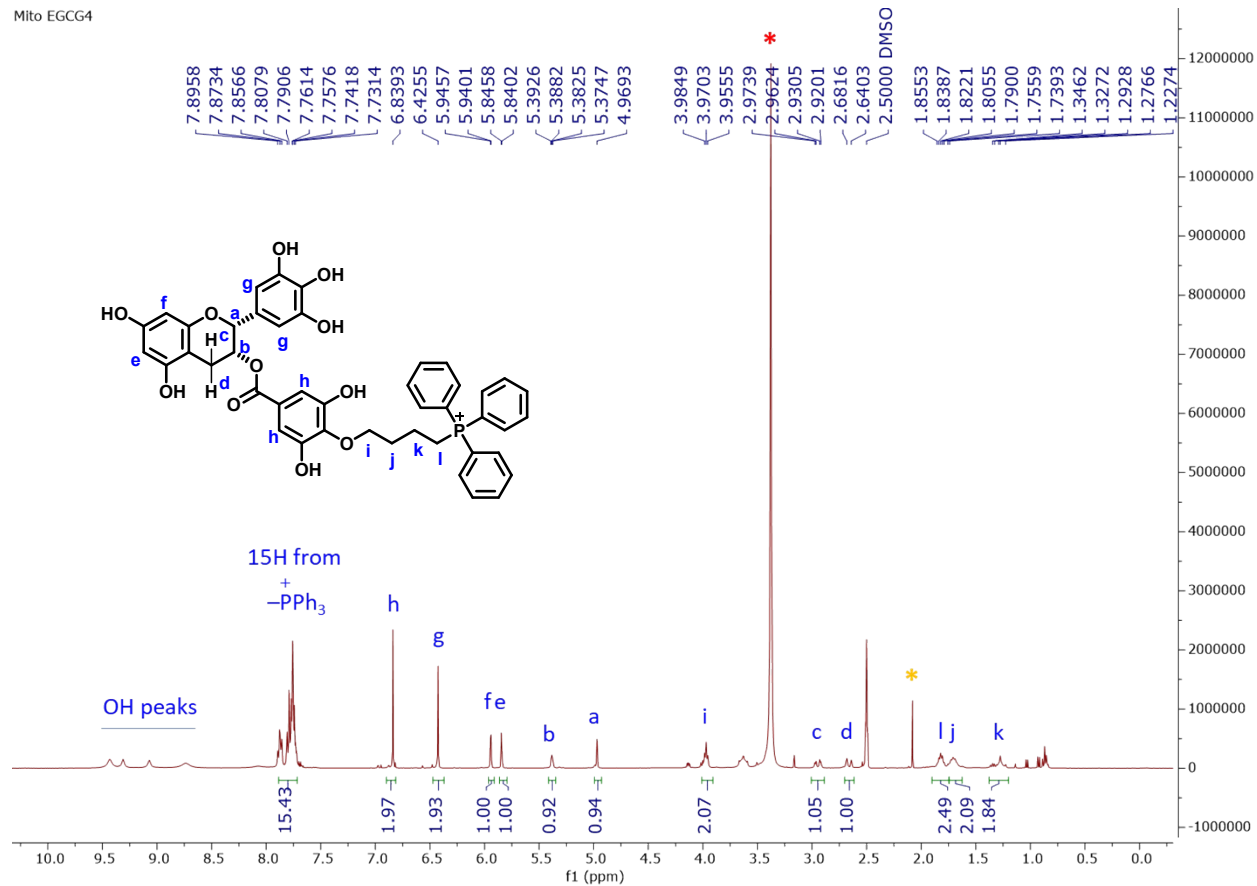

**Figure S7.**  $^1\text{H}$  NMR spectrum of MitoEGCG<sub>4</sub>. \* and \* denotes the residual solvent peaks for H<sub>2</sub>O and acetone respectively.

Mito EGCG6

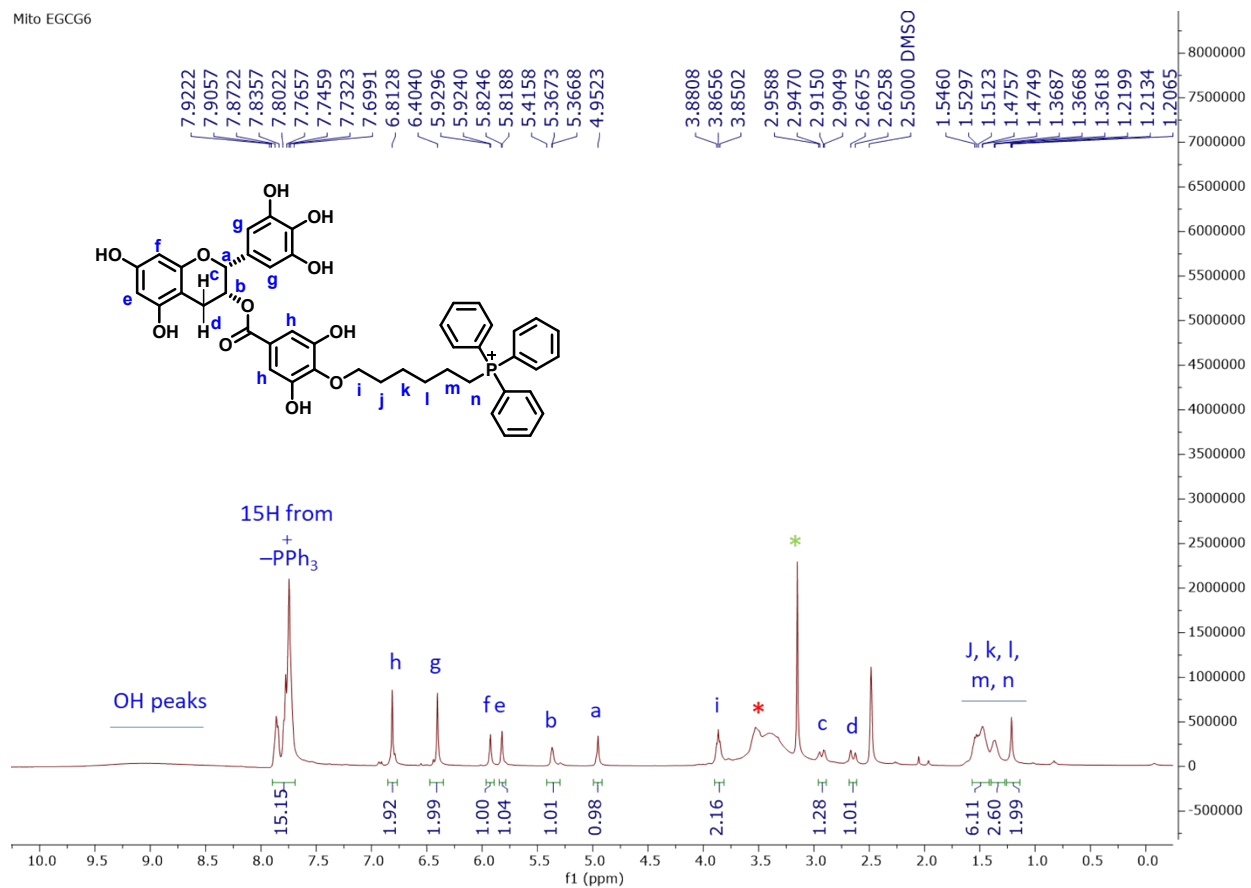

**Figure S8.**  $^1\text{H}$  NMR spectrum of MitoEGCG<sub>6</sub>. \* and \* denotes the residual solvent peaks for H<sub>2</sub>O (and HDO) and methanol respectively.



Mito EGCG8

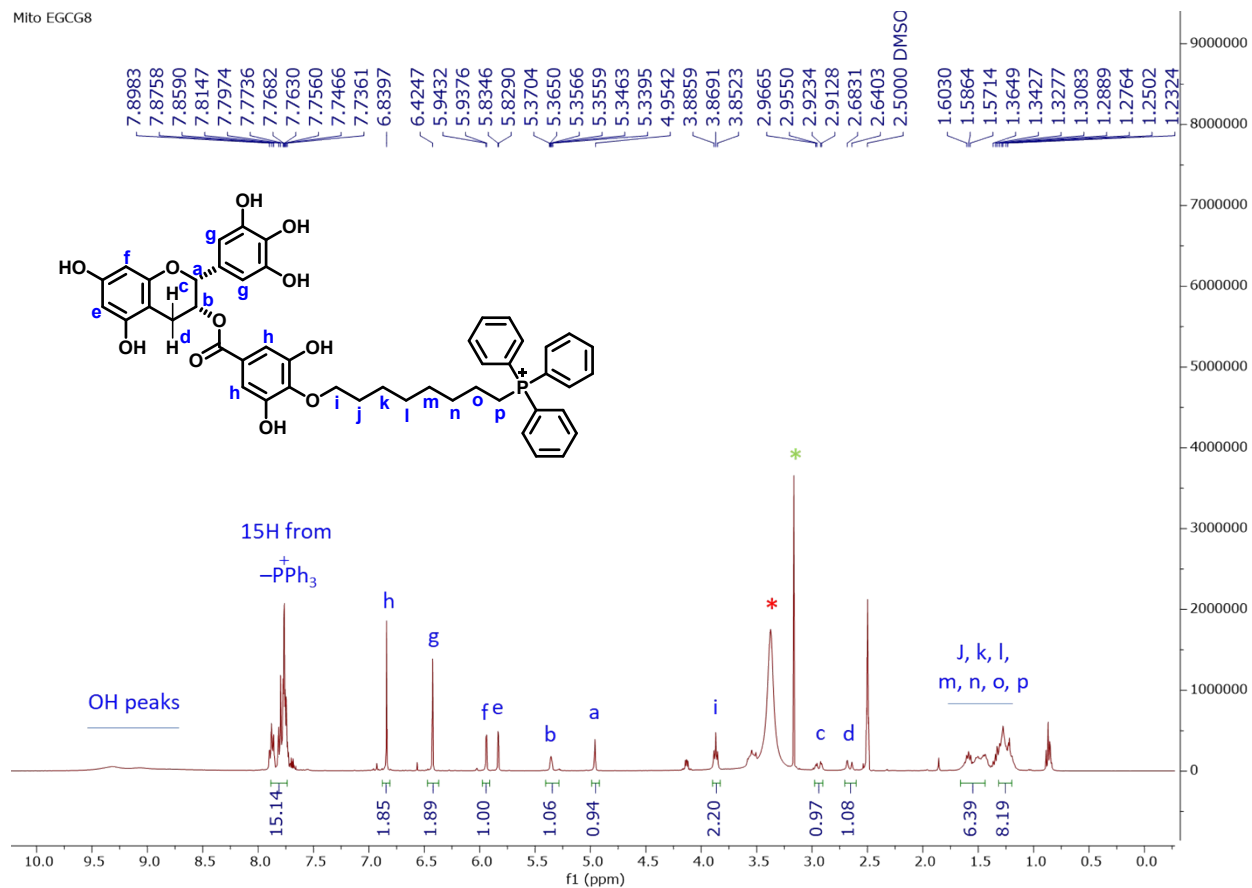

**Figure S9.** <sup>1</sup>H NMR spectrum of MitoEGCG<sub>8</sub>. \* and \* denotes the residual solvent peaks for H<sub>2</sub>O (and HDO) and methanol respectively.

#### 4. $^{13}\text{C}$ NMR spectra of MitoEGCG<sub>n</sub> compounds

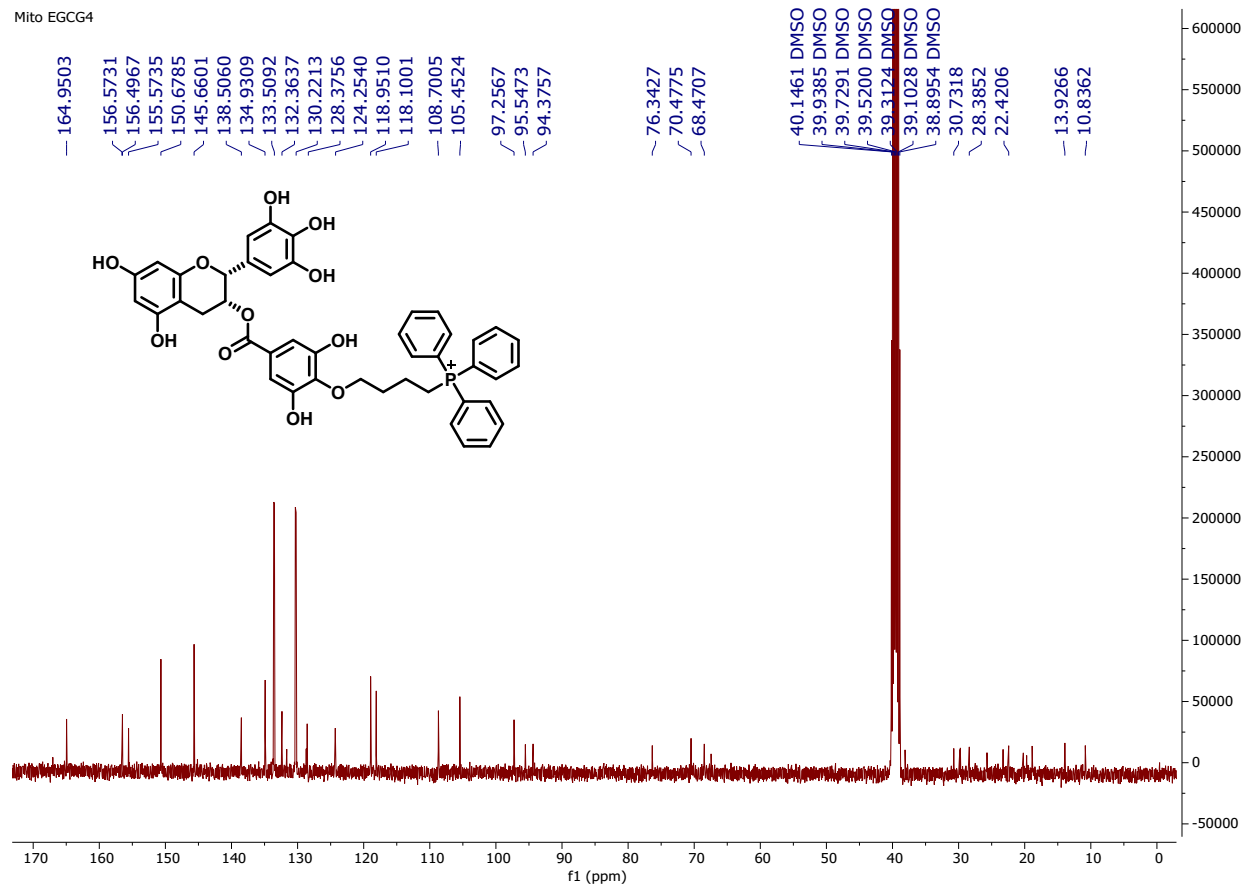

Figure S10.  $^{13}\text{C}$  NMR spectrum of MitoEGCG<sub>4</sub>.

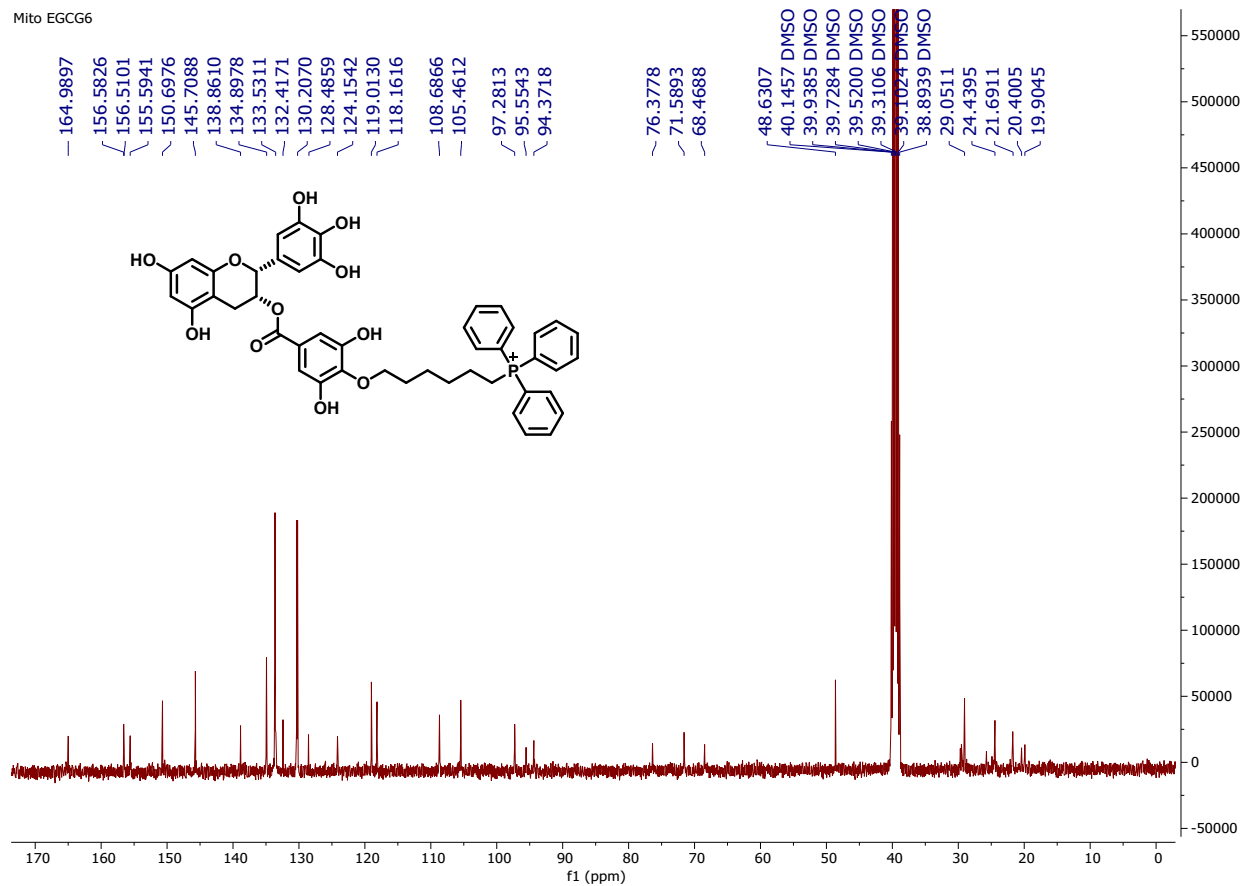

**Figure S11.**  $^{13}\text{C}$  NMR spectrum of MitoEGCG<sub>6</sub>.

Mito EGCG8

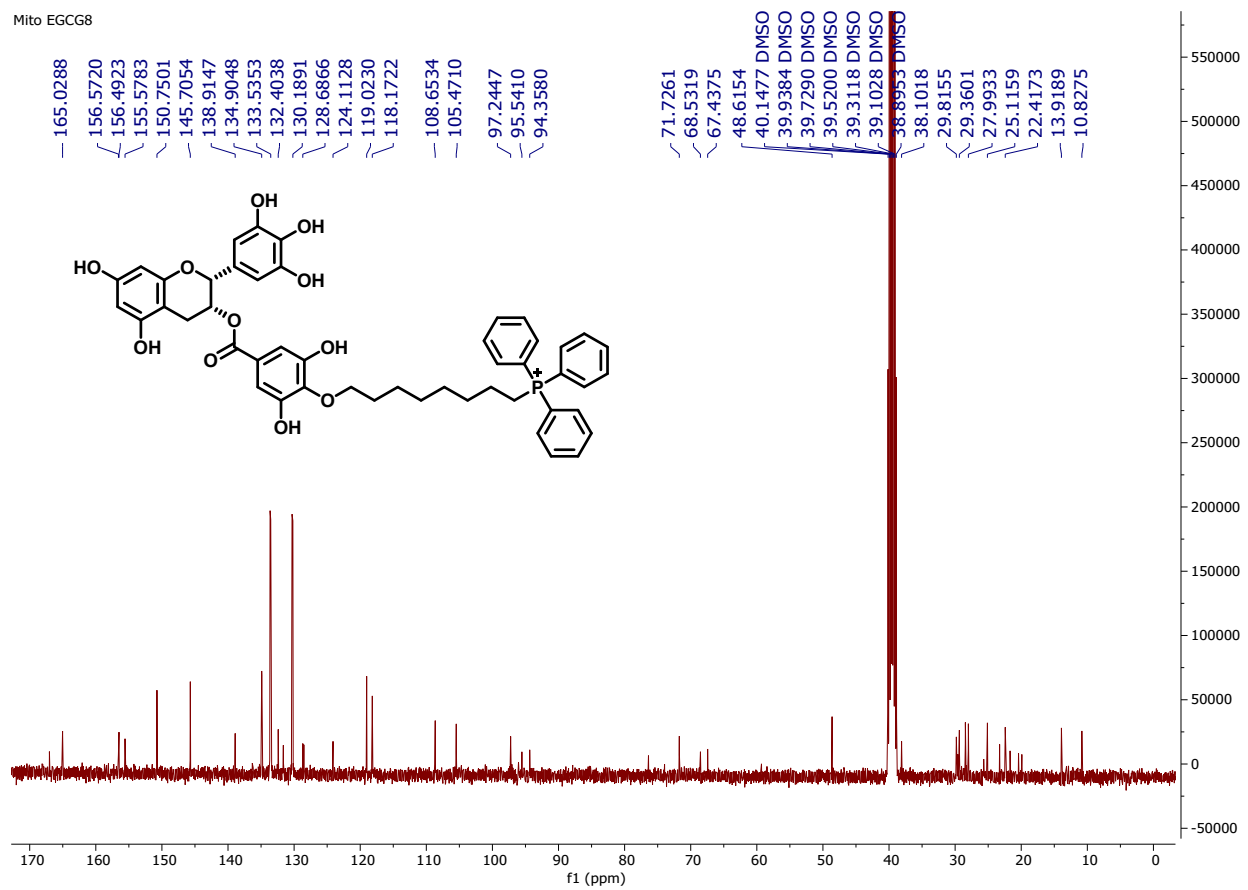

**Figure S12.** <sup>13</sup>C NMR spectrum of MitoEGCG<sub>8</sub>.

## 5. Bright field images of DCFH-DA stained H9c2 cells

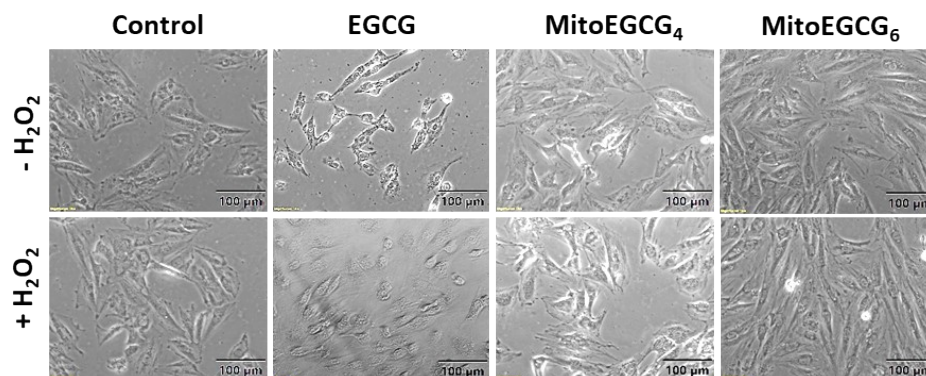

**Figure S13:** Bright field images of DCFH-DA stained H9c2 cells pretreated with 50 μM of EGCG, MitoEGCG<sub>4</sub>, and MitoEGCG<sub>6</sub>.

## 6. Bright field images of TMRE-stained H9c2 cells

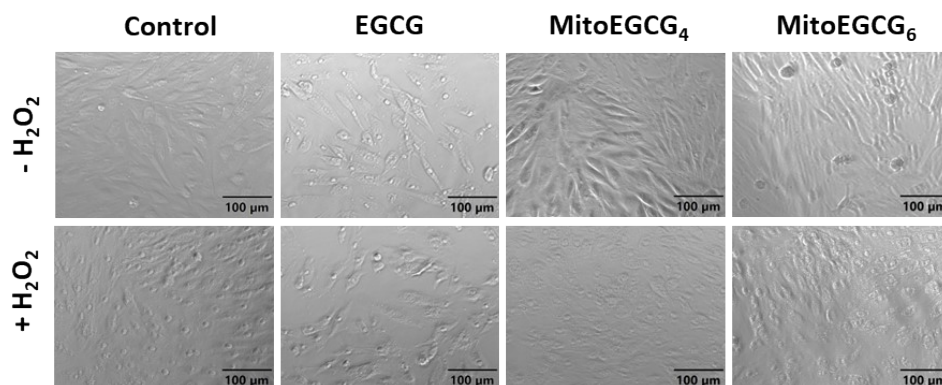

**Figure S14:** Bright field images of TMRE stained H9c2 cells pretreated with 50 μM of EGCG, MitoEGCG<sub>4</sub>, and MitoEGCG<sub>6</sub>.

## 7. Uncropped Western blot images

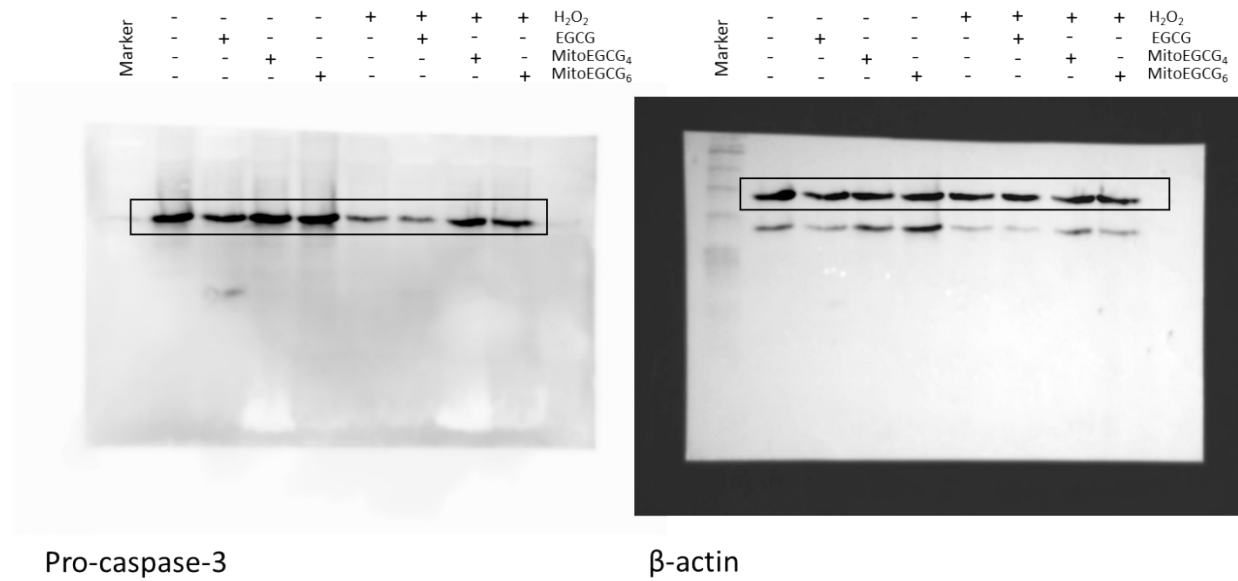

**Figure S15:** Uncropped Western blot images of Figure 6a.
